# Supplementary material for: Ultra-high field MRI of human hippocampi: Morphological and multiparametric differentiation of hippocampal sclerosis subtypes
Source: PubMed Central journal article supplement (PMC5906020; doi:10.1371/journal.pone.0196008), 2018-04-18
Supplement: pone.0196008.s001.pdf [file pone.0196008.s001.pdf]

| Sample | HS Type | Product [mm <sup>2</sup> ] | Area [mm <sup>2</sup> ] | T2Si [a.u.] | T1-time [ms] | T2-time [ms] |
|--------|---------|----------------------------|-------------------------|-------------|--------------|--------------|
| HC001  | I       | 0.41                       | 6.02                    | 123.71      | 331.29       | 53.67        |
| HC002  | no-HS   | 2.79                       | 8.84                    | 152.95      | 1497.74      | 185.13       |
| HC003  | II      | 1.71                       | 10.54                   | 154.78      | 1067.05      | 164.82       |
| HC005  | I       | 0.35                       | 4.79                    | 306.79      | 639.35       | 58.26        |
| HC006  | I       | 0.46                       | 7.59                    | 420.48      | 801.10       | 131.11       |
| HC007  | no-HS   | 3.03                       | 11.64                   | 326.35      | 870.09       | 69.66        |
| HC008  | I       | 0.31                       | 5.42                    | 384.16      | 983.30       | 101.75       |
| HC009  | I       | 0.91                       | 6.76                    | 324.60      | 485.16       | 135.83       |
| HC010  | I       | 0.35                       | 6.62                    | 366.11      | 961.97       | 93.90        |
| HC011  | I       | 1.16                       | 6.19                    | 445.42      | 1051.51      | 98.40        |
| HC012  | II      | 1.63                       | 8.14                    | 287.32      | 450.80       | 82.35        |
| HC013  | I       | 2.51                       | 9.47                    | 439.10      | 1112.56      | 96.16        |
| HC014  | I       | 0.52                       | 5.77                    | 353.02      | 996.66       | 99.67        |

| T2*-time [ms] | FA [a.u.] | ADC [ $\cdot 10^{-6}$ mm <sup>2</sup> /s] | MD [ $\cdot 10^{-6}$ mm <sup>2</sup> /s] |
|---------------|-----------|-------------------------------------------|------------------------------------------|
| 51.28         | 0.14      | 755.23                                    | 181.03                                   |
| 40.97         | 0.25      | 387.99                                    | 273.11                                   |
| 39.22         | 0.40      | 413.52                                    | 342.92                                   |
| 41.38         | 0.20      | 535.55                                    | 523.22                                   |
| 56.91         | 0.12      | 566.31                                    | 621.60                                   |
| 39.67         | 0.17      | 572.24                                    | 514.14                                   |
| 42.61         | 0.19      | 572.81                                    | 449.30                                   |
| 49.33         | 0.10      | 629.14                                    | 579.89                                   |
| 45.13         | 0.14      | 665.80                                    | 551.15                                   |
| 55.77         | 0.12      | 527.89                                    | 705.68                                   |
| 45.30         | 0.19      | 501.71                                    | 449.96                                   |
| 45.74         | 0.15      | 506.86                                    | 628.74                                   |
| 57.64         | 0.18      | 576.39                                    | 659.65                                   |
